# Supplementary material
Source: publisher site journal article supplement (https://www.dovepress.com/article/541026)
Supplement: Supplementary file 1 [file 541026%20Supplementary%20Material.docx]

Table S1 Day-wise investigation and treatment

| **Time**  **(2024)** | **Symptom** | **Body temperature** | **Laboratory investigation**  **(normal value)** | | | | | | | **Treatment** |
| --- | --- | --- | --- | --- | --- | --- | --- | --- | --- | --- |
| **WBC**  **109/L** | **SAA**  **mg/L** | **CRP**  **mg/L** | **PC T**  **ng/L** | **IL-6**  **pg/L** | **ESR**  **mm/H** | **Test** |
| **(3.5-9.5)** | **(0-10)** | **(＜5)** | **(＜0.05)** | **(＜7)** | **(＜15)** |  |
| 11-12 | Numbness in both upper limbs | 36.8 | / | / | / | / | / | / | / | Admitted to our hospital |
| 11-13 | Numbness in both upper limbs | 36.9 | 5 | / | / | / | / | 25 | / | Clindamycin |
| 11-14 | Numbness in both upper limbs | 36.9 | 11.4 | 3.8 | 1.6 | 0.04 | 22.1 | 2 | / | 1. Cervical vertebra surgery 2. Clindamycin |
| 11-15 | / | 37.0 | / | / | / | / | / | / | / | Clindamycin |
| 11-16 | / | 36.9 | / | / | / | / | / | / | / | Clindamycin |
| 11-17 | / | 37.2 | / | / | / | / | / | / | / | Clindamycin |
| 11-18 | / | 36.2 | 6.3 | 94.7 | 9.2 | ＜0.02 | 3.3 | 23 | / | Clindamycin |
| 11-19 | / | 37.0 | / | / | / | / | / | / | / | Clindamycin |
| 11-20 | / | 36.5 | / | / | / | / | / | / | / | Clindamycin |
| 11-21 | / | 37.3 | 11.7 | 59.7 | 26.1 | ＜0.02 | 15.2 | 42 | / | Clindamycin |
| 11-22 | Erythema multiforme | 37.1 | / | / | / | / | / | / | Nasal secretions were negative | 1. Loratadine 2. Dexamethasone sodium phosphate   (No improvement) |
| 1. Ganciclovir 2. Loratadine |
| 11-23 | The rash gradually subsided | 37.4 | / | / | / | / | / | / | / | 1. Ganciclovir 2. Loratadine |
| 11-24 | The rash gradually subsided | 38.0 | / | / | / | / | / | / | / | 1. Ganciclovir 2. Loratadine |
| 11-25 | The rash gradually subsided | 38.9 | 11.6 | 386.9 | 52.4 | ＜0.02 | 29.3 | 77 | No aerobic or anaerobic bacteria were found in blood cultures. | 1. Ganciclovir 2. Loratadine |
| 11-26 | The rash gradually subsided | 39.1 | / | / | / | / | / | / | / | 1. Ganciclovir 2. Loratadine 3. Meropenem |
| 11-27 | The rash completely subsided  Joint pain and myalgia | 39.6 | / | / | / | / | / | / | / | 1. Ganciclovir 2. Loratadine 3. Meropenem |
| 11-28 | / | 38.1 | 9.2 | 2,158.4 | 154.9 | 0.2 | 43 | 73 | / | Meropenem |
| 11-29 | / | 37 | / | / | / | / | / | / | / | Meropenem |
| 11-30 | / | 36.8 | / | / | / | / | / | / | / | Meropenem |
| 12-01 | / | 36.3 | 7.4 | 458.4 | 35 | 0.11 | 4.5 | 92 | / | Meropenem |
| 12-02 | / | 36.3 | / | / | / | / | / | / | / | Meropenem |
| 12-03 | / | 37.0 | 9.3 | 82.2 | 7.6 | 0.1 | 4.2 | 92 | / | Meropenem |
| 12-04 | / | 36.9 | / | / | / | / | / | / | / | Meropenem |
| 12-05 | / | 36.9 | / | / | / | / | / | / | / | Meropenem |
| 12-06 | / | 36.9 | / | / | / | / | / | / | / | Moxifloxacin hydrochloride |
| 12-07 | / | 37.0 | / | / | / | / | / | / | / | Moxifloxacin hydrochloride |
| 12-08 | / | 37.4 | 6.1 | 26.3 | 6.6 | ＜0.02 | ＜1.5 | 58 | / | Moxifloxacin hydrochloride |
| 12-09 | / | 36.8 | / | / | / | / | / | / | / | Moxifloxacin hydrochloride |
| 12-10 | / | 36.8 | 5.5 | 12 | 3.8 | ＜0.02 | ＜1.5 | 30 | / | Moxifloxacin hydrochloride |
